# Supplementary material for: What Does Depression Mean for Korean American Elderly?: A Qualitative Follow-Up Study
Source: PubMed Central journal article supplement — Psychiatry Investig. 2016 Sep 30;13(5):558–65. doi: 10.4306/pi.2016.13.5.558 (PMC5067351; doi:10.4306/pi.2016.13.5.558), 2016-09-30
Supplement: pi-13-558-s001.pdf [file pi-13-558-s001.pdf]

## Supplementary 1

### 1a. Patient Health Questionnaire-9 in English

Over the last 2 weeks, how often have you been bothered by any of the following problems?

|                                                                                                                                                                          | Not at all                 | Several days               | More than a half the days  | Nearly every day           |
|--------------------------------------------------------------------------------------------------------------------------------------------------------------------------|----------------------------|----------------------------|----------------------------|----------------------------|
| Little interest or pleasure in doing things                                                                                                                              | <input type="checkbox"/> 0 | <input type="checkbox"/> 1 | <input type="checkbox"/> 2 | <input type="checkbox"/> 3 |
| Feeling down, depressed, or hopeless                                                                                                                                     | <input type="checkbox"/> 0 | <input type="checkbox"/> 1 | <input type="checkbox"/> 2 | <input type="checkbox"/> 3 |
| Trouble falling or staying asleep, or sleeping too much                                                                                                                  | <input type="checkbox"/> 0 | <input type="checkbox"/> 1 | <input type="checkbox"/> 2 | <input type="checkbox"/> 3 |
| Feeling tired or having little energy                                                                                                                                    | <input type="checkbox"/> 0 | <input type="checkbox"/> 1 | <input type="checkbox"/> 2 | <input type="checkbox"/> 3 |
| Poor appetite or overeating                                                                                                                                              | <input type="checkbox"/> 0 | <input type="checkbox"/> 1 | <input type="checkbox"/> 2 | <input type="checkbox"/> 3 |
| Feeling bad about yourself - or that you are a failure or have let yourself or your family down                                                                          | <input type="checkbox"/> 0 | <input type="checkbox"/> 1 | <input type="checkbox"/> 2 | <input type="checkbox"/> 3 |
| Trouble concentrating on things, such as reading the newspaper or watching television                                                                                    | <input type="checkbox"/> 0 | <input type="checkbox"/> 1 | <input type="checkbox"/> 2 | <input type="checkbox"/> 3 |
| Moving or speaking so slowly that other people could have noticed? Or the opposite - being so fidgety or restless that you have been moving around a lot more than usual | <input type="checkbox"/> 0 | <input type="checkbox"/> 1 | <input type="checkbox"/> 2 | <input type="checkbox"/> 3 |
| Thoughts that you would be better off dead or of hurting yourself in some way                                                                                            | <input type="checkbox"/> 0 | <input type="checkbox"/> 1 | <input type="checkbox"/> 2 | <input type="checkbox"/> 3 |
| <b>Total</b>                                                                                                                                                             | (            ) Point       |                            |                            |                            |

### 1b. Patient Health Questionnaire-9 in Korean

지난 2주 동안, 아래 나열되는 증상들에 얼마나 자주 시달렸습니까?

|                                                                            | 전혀 아니다                     | 가끔                         | 일주일 이상                     | 거의 매일                      |
|----------------------------------------------------------------------------|----------------------------|----------------------------|----------------------------|----------------------------|
| C1. 일을 하는 것에 대한 흥미나 재미가 거의 없음                                              | <input type="checkbox"/> 0 | <input type="checkbox"/> 1 | <input type="checkbox"/> 2 | <input type="checkbox"/> 3 |
| C2. 가라앉은 느낌, 우울감 혹은 절망감                                                    | <input type="checkbox"/> 0 | <input type="checkbox"/> 1 | <input type="checkbox"/> 2 | <input type="checkbox"/> 3 |
| C3. 잠들기 어렵거나 자꾸 깨어남, 혹은 너무 많이 잠                                            | <input type="checkbox"/> 0 | <input type="checkbox"/> 1 | <input type="checkbox"/> 2 | <input type="checkbox"/> 3 |
| C4. 피곤감, 기력이 저하됨                                                           | <input type="checkbox"/> 0 | <input type="checkbox"/> 1 | <input type="checkbox"/> 2 | <input type="checkbox"/> 3 |
| C5. 식욕 저하 혹은 과식                                                            | <input type="checkbox"/> 0 | <input type="checkbox"/> 1 | <input type="checkbox"/> 2 | <input type="checkbox"/> 3 |
| C6. 내 자신이 나쁜 사람이라는 느낌-혹은 내 자신을 실패자라고 느끼거나, 나 때문에 나 자신이나 내 가족이 불행하게 되었다는 느낌 | <input type="checkbox"/> 0 | <input type="checkbox"/> 1 | <input type="checkbox"/> 2 | <input type="checkbox"/> 3 |
| C7. 신문을 읽거나 TV를 볼 때 집중하기 어려움                                               | <input type="checkbox"/> 0 | <input type="checkbox"/> 1 | <input type="checkbox"/> 2 | <input type="checkbox"/> 3 |
| C8. 남들이 알아챌 정도로 거동이나 말이 느림. 또는 반대로 너무 초조하고 안절부절하지 못해서 평소보다 많이 돌아다니고 서성거림   | <input type="checkbox"/> 0 | <input type="checkbox"/> 1 | <input type="checkbox"/> 2 | <input type="checkbox"/> 3 |
| C9. 나는 차라리 죽는게 낫다는 등의 생각 혹은 스스로에게 상처를 주는 생각들                               | <input type="checkbox"/> 0 | <input type="checkbox"/> 1 | <input type="checkbox"/> 2 | <input type="checkbox"/> 3 |
| <b>총 점</b>                                                                 | (            ) 점           |                            |                            |                            |
