# Supplementary material for: What Does Depression Mean for Korean American Elderly?: A Qualitative Follow-Up Study
Source: PubMed Central journal article supplement — Psychiatry Investig. 2016 Sep 30;13(5):558–65. doi: 10.4306/pi.2016.13.5.558 (PMC5067351; doi:10.4306/pi.2016.13.5.558), 2016-09-30
Supplement: pi-13-558-s002.pdf [file pi-13-558-s002.pdf]

## Supplementary 2

### Semi-structured interview guide in English (Korean version available upon request)

#### Building Rapport/Social Support

- When and why did you come to the U.S.?
- Tell me about your family members in Korea or in the U.S.
- Please tell me a little about the people in your life who are important to you.
- Who do you go to talk and receive support when you are having a difficult time and need support? How did this support change from when you were in Korea to when in the U.S.? Please tell me if these people are available to you when you are in need of help. These questions are intended to find out in which way they are helpful to you.

| Present/Past | In the U.S.                                           |                                         |
|--------------|-------------------------------------------------------|-----------------------------------------|
|              | Is this person available to you when you are in need? | How much is this person helpful to you? |
|              | 0. No                                                 | 1. A little                             |
|              | 1. Yes                                                | 2. Moderate                             |
|              |                                                       | 3. A lot                                |

1. Your spouse
2. Wife's sibling(s)
3. Husband's sibling(s)
4. Son(s)
5. Daughter(s)
6. Other relative
7. Friend(s)
8. Neighbor(s)
9. Social worker(s)
10. Teacher(s)
11. Psychological therapist(s)
12. Doctor(s)
13. Social agencies
14. Doctor(s)/nurse(s) in community health clinic
15. Others

(Modified version of SSS-PCD, Shin & Crittenden, 2003)

#### Semi-structured Vignettes

In this part, I will read a story to you. When it is over, I will ask you your opinion about it.

IF R IS MALE, READ MALE SCENARIO. IF R IS FEMALE, READ FEMALE SCENARIO.

Mr/Mrs. R is a (R's AGE) year old man/woman who was deeply religious and was active in his church his whole life. He believed that God wasn't going to give you more than you could bear. He took pills for his heart three times a day and insulin injections every morning. He usually handled things okay, but recently he told his pastor he felt "weighed down by the world." He found that he did not enjoy his food, and lost weight. Others noticed that he was forgetful and no longer cared about his appearance. His doctor examined and tested him thoroughly and found his health to be the same. Nevertheless, Mr/Mrs. R did not feel well.

- A. What do you think is the matter with (Mr./Mrs.) R?
- B. What should be done about it?
- C. Who could help?

IF R IS MALE, READ MALE SCENARIO. IF R IS FEMALE, READ FEMALE SCENARIO.

Mr/Mrs. B is a (R's AGE) year old man/woman whose wife died 8 years ago. They raised three children who are now all married with families of their own and living in different states. He has good visits with them about once a year. He used to play cards with friends every Wednesday. Lately, though, he can hardly drag himself out of bed in the morning, let alone get himself dressed and out to a card game. He has no energy and lost 12 pounds. His doctor examined him thoroughly and found his health to be the same. Nevertheless, Mr/Mrs. B does not feel well.

- A. What do you think is the matter with (Mr./Mrs.) B?
- B. What should be done about it?
- C. Who could help?

Now I am going to read you a story and once I am finished, I will ask you to give me words you would use to describe this person. For instance, if I were to ask you to list words to describe "animals", what kinds of words will you use? E.g., dog, cat, cow, chicken, etc. Yes, that's what I am asking you to do after I tell you the following study.

Mr. M is a 71 year old retired barber who has constant pain in his back and knees. Lately, he has had no interest in walking his dog or watching his favorite TV shows. His wife was frustrated because he also recently stopped attending church and seemed forgetful. As weeks went by he often awoke at night and couldn't get back to sleep. He felt exhausted and slowed down. His doctor examined him and tested him thoroughly, and found his health to be okay. Nevertheless, Mr. M did not feel well.  
What words would you use to describe Mr. M?

Now I would like you to list words that describe you when you are feeling down in the dumps, when you are feeling blue or when your spirits are low. Again, one word answers would be good. I will write them down in the order that you give them to me.

#### Attitude toward depression

- We heard that people with depression are often receiving care at the mental hospital. What kinds of symptoms and situations do you think cause them to receive care?
- What do you think causes depression?
- What do you think doctors mean when they use the word depressed?
- Do you think that depression could be avoided or prevented?
- Do you think depression of adults over 60 years old will get better? (Or, do you think it is a natural part of aging?)
- Have you ever known anyone else who you would say was depressed?
  - IF YES, ASK: What were they like?
  - IF YES, ASK: Does this describe the way you feel or felt when you were depressed (or down in the dumps)?  
PROMPT: In what ways? Please tell me about that.
- Have you ever thought of yourself as someone who is depressed?
- When did these feelings start?
- Why do you think these feelings started when they did?
- How does religion affect people with depression?

#### Help-seeking behavior

- What do you do to feel better when you are feeling depressed, blue, or down in the dumps?
  - Do these feelings affect your daily routine (both day and night)?
  - Do these feelings affect your relationship with family, friends, and others?
  - The last time you went to the doctor, (your family doctor or primary care doctor), why did you go?
  - During that visit to the doctor, did you feel that your doctor understood how you felt? Please explain (ASK ABOUT PHYSICALLY AND EMOTIONALLY IF R DOES NOT COVER BOTH).
  - What physical problems do you have that affect your mood or the way you feel emotionally?
- IF R REPORTS A PHYSICAL ILLNESS OR PROBLEM, PROBE: "Tell me about how your (ILLNESS) affects you?"
- How about the reverse, does your mood or your emotions affect the way you feel physically? In what way?

#### Mental Health Service Use

- Are there governmental or non-governmental agencies you can go to if you or others have depressive symptoms?
- What kind of treatment would work if you or others are meeting with the professional to relieve symptoms of depression?
- Do you think doctors know how to diagnose and treat depression?
- Do you think medication can help people who are depressed? Please explain.
  - Are there **times** when medicine doesn't help?
  - Are there **people** for whom medicine doesn't help?  
**IF YES, ASK:** Why?  
What do you think they should do instead?
- What problems can be caused by medication for depression? Please give me some examples.
- Some people find that talking things over helps when they are depressed. Is this something you'd consider?
- What do you think about getting counseling or therapy?
- Are there **times** when counseling/talking to someone doesn't help?
- Are there **people** for whom counseling/talking to someone doesn't help?  
**IF YES, ASK:** Why?  
What do you think they should do instead?
- What kind of person would make a good counselor?  
IF R ANSWERS WITH QUALITIES OF A PERSON, ASK: What profession or role would that person have?
- Where would be a good place to go for counseling? For example, your doctor's office, some place separate from your doctor's office.
- Do you think depression is a medical condition? If not, what kind of condition is depression?
- How does depression affect people in the long term? PROMPT: How serious is it?
- What things about depression would you like to tell me about that we haven't talked about?
